# Supplementary material
Source: HighWire-hosted journal article supplement (https://bmjopen.bmj.com/content/14/11/e092019)
Supplement: inline-supplementary-material-1 [file inline-supplementary-material-1.pdf]

**Table 1:** Search strategy of databases

| No. | Database       | Search strategy                                                                                                                                                                                                                                                                                                                                                                                                                                                                                                                                                                                                                                                                                                                                                                                                                                                                                                            |
|-----|----------------|----------------------------------------------------------------------------------------------------------------------------------------------------------------------------------------------------------------------------------------------------------------------------------------------------------------------------------------------------------------------------------------------------------------------------------------------------------------------------------------------------------------------------------------------------------------------------------------------------------------------------------------------------------------------------------------------------------------------------------------------------------------------------------------------------------------------------------------------------------------------------------------------------------------------------|
| 1   | PubMed         | ((("antibiotics" [MeSH Terms] OR "antimicrobial agents" [MeSH Terms] OR "anti-infective agents" [MeSH Terms] OR "antibacterial drugs" [All Fields] OR "broad spectrum antibiotics" [All Fields])<br><br>AND ("prenatal exposure delayed effects" [MeSH Terms] OR "maternal exposure" [All Fields] OR "intrauterine exposure" [All Fields] OR "gestational drug exposure" [All Fields])<br><br>AND ("orofacial clefts" [MeSH Terms] OR "cleft lip" [MeSH Terms] OR "cleft palate" [MeSH Terms] OR "congenital defects" [MeSH Terms] OR "birth defects" [All Fields] OR "congenital anomalies" [All Fields])<br><br>AND ("observational study" [MeSH Terms] OR "longitudinal study" [MeSH Terms] OR "retrospective study" [MeSH Terms] OR "prospective study" [MeSH Terms] OR "epidemiological research" [All Fields] OR "randomized controlled trial" [MeSH Terms] OR "RCT" [All Fields] OR "clinical trial" [MeSH Terms])) |
| 2   | Web of Science | TS=("antibiotics" OR "antimicrobial agents" OR "anti-infective agents" OR "antibacterial drugs" OR "broad spectrum antibiotics")<br><br>AND TS=("prenatal exposure delayed effects" OR "maternal exposure" OR "intrauterine exposure" OR "gestational drug exposure")<br><br>AND TS=("orofacial clefts" OR "cleft lip" OR "cleft palate" OR "congenital defects" OR "birth defects" OR "congenital anomalies")<br><br>AND TS=("observational study" OR "longitudinal study" OR "retrospective study" OR "prospective study" OR "epidemiological research" OR "randomized controlled trial" OR "RCT" OR "clinical trial")                                                                                                                                                                                                                                                                                                   |
| 3   | EMBASE         | ('antibiotic'/exp OR 'antimicrobial agent'/exp OR 'anti-infective agent'/exp OR 'antibacterial drug' OR 'broad spectrum antibiotic')<br><br>AND ('prenatal exposure'/exp OR 'maternal exposure' OR 'intrauterine exposure' OR 'gestational drug exposure')<br><br>AND ('orofacial cleft'/exp OR 'cleft lip'/exp OR 'cleft palate'/exp OR 'congenital defect'/exp OR 'birth defect' OR 'congenital anomaly')                                                                                                                                                                                                                                                                                                                                                                                                                                                                                                                |

|   |                  |                                                                                                                                                                                                                                                                                                                                                                                                                                                                                                                                                                                                                                                                                                                                                                                                                                                                                     |
|---|------------------|-------------------------------------------------------------------------------------------------------------------------------------------------------------------------------------------------------------------------------------------------------------------------------------------------------------------------------------------------------------------------------------------------------------------------------------------------------------------------------------------------------------------------------------------------------------------------------------------------------------------------------------------------------------------------------------------------------------------------------------------------------------------------------------------------------------------------------------------------------------------------------------|
|   |                  | AND ('observational study'/exp OR 'longitudinal study'/exp OR 'retrospective study'/exp OR 'prospective study'/exp OR 'randomized controlled trial'/exp OR 'RCT'/exp OR 'clinical trial'/exp)                                                                                                                                                                                                                                                                                                                                                                                                                                                                                                                                                                                                                                                                                       |
| 4 | Scopus           | <p>(TITLE-ABS-KEY(antibiotics) OR TITLE-ABS-KEY(antimicrobial agents) OR TITLE-ABS-KEY(anti-infective agents) OR TITLE-ABS-KEY(antibacterial drugs) OR TITLE-ABS-KEY(broad spectrum antibiotics))</p> <p>AND (TITLE-ABS-KEY(prenatal exposure delayed effects) OR TITLE-ABS-KEY(maternal exposure) OR TITLE-ABS-KEY(intrauterine exposure) OR TITLE-ABS-KEY(gestational drug exposure))</p> <p>AND (TITLE-ABS-KEY(orofacial clefts) OR TITLE-ABS-KEY(cleft lip) OR TITLE-ABS-KEY(cleft palate) OR TITLE-ABS-KEY(congenital defects) OR TITLE-ABS-KEY(birth defects) OR TITLE-ABS-KEY(congenital anomalies))</p> <p>AND (TITLE-ABS-KEY(observational study) OR TITLE-ABS-KEY(longitudinal study) OR TITLE-ABS-KEY(retrospective study) OR TITLE-ABS-KEY(prospective study) OR TITLE-ABS-KEY(randomized controlled trial) OR TITLE-ABS-KEY(RCT) OR TITLE-ABS-KEY(clinical trial))</p> |
| 5 | PSycINFO         | <p>("antibiotics" OR "antimicrobial agents" OR "anti-infective agents" OR "antibacterial drugs" OR "broad spectrum antibiotics")</p> <p>AND ("prenatal exposure delayed effects" OR "maternal exposure" OR "intrauterine exposure" OR "gestational drug exposure")</p> <p>AND ("orofacial clefts" OR "cleft lip" OR "cleft palate" OR "congenital defects" OR "birth defects" OR "congenital anomalies")</p> <p>AND ("observational study" OR "longitudinal study" OR "retrospective study" OR "prospective study" OR "randomized controlled trial" OR "RCT" OR "clinical trial")</p>                                                                                                                                                                                                                                                                                               |
| 6 | Cochrane Library | ("antibiotics" [MeSH descriptor] OR "antimicrobial agents" OR "anti-infective agents" OR "antibacterial drugs" OR "broad spectrum antibiotics")                                                                                                                                                                                                                                                                                                                                                                                                                                                                                                                                                                                                                                                                                                                                     |

|   |                    |                                                                                                                                                                                                                                                                                                                                                                                                                                                                                                                |
|---|--------------------|----------------------------------------------------------------------------------------------------------------------------------------------------------------------------------------------------------------------------------------------------------------------------------------------------------------------------------------------------------------------------------------------------------------------------------------------------------------------------------------------------------------|
|   |                    | <p>AND ("prenatal exposure delayed effects" [MeSH descriptor] OR "maternal exposure" OR "intrauterine exposure" OR "gestational drug exposure")</p> <p>AND ("orofacial clefts" [MeSH descriptor] OR "cleft lip" OR "cleft palate" OR "congenital defects" OR "birth defects" OR "congenital anomalies")</p> <p>AND ("observational studies" [MeSH descriptor] OR "longitudinal studies" OR "retrospective studies" OR "prospective studies" OR "randomized controlled trial" OR "RCT" OR "clinical trial")</p> |
| 7 | ClinicalTrials.gov | <p>Condition: "Orofacial clefts" OR "cleft lip" OR "cleft palate" OR "congenital defects"</p> <p>Intervention: "antibiotics" OR "antimicrobial agents" OR "anti-infective agents" OR "antibacterial drugs"</p> <p>Study Type: Interventional Studies (Clinical Trials)</p>                                                                                                                                                                                                                                     |
